# Supplementary material
Source: MDPI journal article supplement (https://www.mdpi.com/2073-4344/12/1/46)
Supplement: s1 [file s1]

## Supplementary Material

### Photocatalytic performance of carbon-containing Cu-Mo-based catalysts under sunlight illumination

Paula Muñoz-Flores <sup>a,b,\*</sup>, Po S. Poon <sup>a</sup>, Catherine Sepulveda <sup>c</sup>, Conchi O. Ania <sup>d,\*</sup>, Juan  
Matos <sup>e,\*</sup>

<sup>a</sup> Unidad de Desarrollo Tecnológico (UDT), Universidad de Concepción, Barrio Universitario s/n, Concepción, Chile.

<sup>b</sup> Departamento de Ingeniería Química, Facultad de Ingeniería, Universidad de Concepción, Barrio Universitario s/n, Concepción, Chile.

<sup>c</sup> Facultad de Ciencias Químicas, Universidad de Concepción, Casilla 160C, Chile.

<sup>d</sup> CEMHTI, CNRS (UPR 3079), Université d'Orléans, 45071 Orléans, France.

<sup>e</sup> Instituto de Ciencias Químicas Aplicadas, Facultad de Ingeniería, Universidad Autónoma de Chile, 8900000 Santiago, Chile.

\*Corresponding authors E-mails: [paulamunozf@udec.cl](mailto:paulamunozf@udec.cl) (P. Muñoz-Flores); [conchi.ania@cnrs-orleans.fr](mailto:conchi.ania@cnrs-orleans.fr) (C.O. Ania); [juan.matos@uautonoma.cl](mailto:juan.matos@uautonoma.cl) (J. Matos)

Phone: +56 9 9379 8340

**Table S1.** Yields of synthesis and stoichiometric expressions describing the thermal degradation of furfural, Cu- and Mo-salts.

| Step            | Sample <sup>a</sup>       | Average<br>yield (%) | Global<br>yield (%) <sup>b</sup> |
|-----------------|---------------------------|----------------------|----------------------------------|
| 1 <sup>st</sup> | Cu4                       | 30 ± 1               | 30 ± 1                           |
| 2 <sup>nd</sup> | Cu4-350-O <sub>2</sub>    | 76 ± 3               | 23 ± 4                           |
| 2 <sup>nd</sup> | Cu4-550-O <sub>2</sub>    | 67 ± 8               | 20 ± 9                           |
| 2 <sup>nd</sup> | Cu4-800-N <sub>2</sub>    | 77 ± 4               | 23 ± 5                           |
| 1 <sup>st</sup> | Mo4                       | 73 ± 3               | 73 ± 3                           |
| 2 <sup>nd</sup> | Mo4-350-O <sub>2</sub>    | 73 ± 6               | 53 ± 9                           |
| 2 <sup>nd</sup> | Mo4-550-O <sub>2</sub>    | 71 ± 5               | 52 ± 8                           |
| 2 <sup>nd</sup> | Mo4-800-N <sub>2</sub>    | 64 ± 2               | 47 ± 5                           |
| 1 <sup>st</sup> | Cu4Mo4                    | 69 ± 3               | 69 ± 3                           |
| 2 <sup>nd</sup> | Cu4Mo4-350-O <sub>2</sub> | 80 ± 5               | 55 ± 8                           |
| 2 <sup>nd</sup> | Cu4Mo4-550-O <sub>2</sub> | 76 ± 3               | 52 ± 6                           |
| 2 <sup>nd</sup> | Cu4Mo4-800-N <sub>2</sub> | 75 ± 2               | 52 ± 5                           |

<sup>a</sup> The nominal weight expected of solid carbon C formed from furfural thermal degradation is ca. 0.312 g,

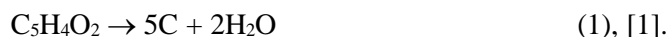

The nominal weight expected of CuO from Cu(O<sub>2</sub>C<sub>5</sub>H<sub>7</sub>)<sub>2</sub> is ca. 0.152 g,

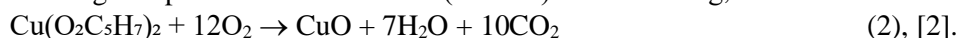

The nominal weight expected for MoO<sub>3</sub> from (NH<sub>4</sub>)<sub>6</sub>Mo<sub>7</sub>O<sub>24</sub>·4H<sub>2</sub>O is ca. 0.408 g,

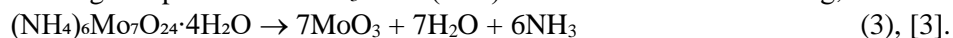

Thus, a total nominal weight of ca. 0.464 g is expected for the synthesis of the Cu4 catalyst. Similarly, the total nominal weight expected for Mo4 and Cu4Mo4 catalysts are ca. 0.720 g, and 0.872 g, respectively.

<sup>b</sup> Global yield estimated from the product between the average yield at first-step and second-step and then divided by 100.

[1] J. Matos, P. Atienzar, H. García, J.C.J. Hernández-Garrido. Nanocrystalline carbon–TiO<sub>2</sub> hybrid hollow spheres as possible electrodes for solar cells. Carbon. 53 (2013) 169 –181.

[2] R.S. Mann, K.C. Khulbe. ESR study of MoO<sub>3</sub> obtained from thermal decomposition of ammonium molybdate. Bull. Chem. Soc. Japan. 48 (1975) 1021-1023.

[3] Q. Jin, M. Fujishima, A. Iwaszuk, M. Nolan, H. Tada. Loading effect in copper (II) oxide cluster-surface-modified titanium (IV) oxide on visible- and UV-light activities. J. Phys. Chem. C. 117 (2013) 23848-23857.

**Table S2.** Summary of the proximate analysis of the prepared catalysts.

| <b>Catalysts</b>                | <b>Moisture<br/>(wt. %)</b> | <b>Inorganic Content<br/>(wt. %)</b> | <b>Carbon Content<br/>(wt. %)</b> |
|---------------------------------|-----------------------------|--------------------------------------|-----------------------------------|
| <b>Cu4</b>                      | 1.1 ± 0.1                   | 45.2 ± 0.9                           | 53.7 ± 0.7                        |
| <b>Cu4-350-O<sub>2</sub></b>    | 0.26 ± 0.05                 | 91.0 ± 0.7                           | 9.1 ± 0.2                         |
| <b>Cu4-550-O<sub>2</sub></b>    | 0.40 ± 0.08                 | 97.7 ± 0.3                           | 1.9 ± 0.4                         |
| <b>Cu4-800-N<sub>2</sub></b>    | 1.6 ± 0.1                   | 78.1 ± 0.5                           | 20.3 ± 0.6                        |
| <b>Mo4</b>                      | 0.70 ± 0.03                 | 74.3 ± 0.1                           | 25.0 ± 0.6                        |
| <b>Mo4-350-O<sub>2</sub></b>    | 0.90 ± 0.03                 | 95.1 ± 0.1                           | 4.0 ± 0.1                         |
| <b>Mo4-550-O<sub>2</sub></b>    | 0.64 ± 0.02                 | 98.7 ± 0.5                           | 0.66 ± 0.08                       |
| <b>Mo4-800-N<sub>2</sub></b>    | 0.40 ± 0.02                 | 91.3 ± 0.7                           | 8.3 ± 0.5                         |
| <b>Cu4Mo4</b>                   | 0.90 ± 0.07                 | 83.4 ± 0.2                           | 15.7 ± 0.2                        |
| <b>Cu4Mo4-350-O<sub>2</sub></b> | 0.60 ± 0.01                 | 96.4 ± 0.9                           | 3.0 ± 0.2                         |
| <b>Cu4Mo4-550-O<sub>2</sub></b> | 0.34 ± 0.05                 | 99.3 ± 0.8                           | 0.36 ± 0.05                       |
| <b>Cu4Mo4-800-N<sub>2</sub></b> | 0.80 ± 0.02                 | 95.3 ± 0.7                           | 3.9 ± 0.3                         |

**Table S3.** Summary of kinetic models for the analysis of the kinetic data of Y5 adsorption.

| Kinetic model           | Equation                                                |
|-------------------------|---------------------------------------------------------|
| Pseudo-first-order      | $\log(n_{eq} - n_{ads}) = \log(n_{eq}) - (k_1/2.303) t$ |
| Pseudo-second-order     | $(1/n_{eq} - n_{ads}) = (1/n_{eq}) + k_2 t$             |
| Intraparticle diffusion | $n_{ads-t} = C + k_p t^{1/2}$                           |

The pseudo-first-order model showed in Eq. (1), where  $k_1$  is the pseudo-first-order rate constant ( $\text{min}^{-1}$ ) for the adsorption,  $n_{ads}$  the amount of tallow 5 (Y5) adsorbed (in  $\mu\text{mol}$ ), at time  $t$  (min) and  $n_{eq}$  is the amount adsorbed at equilibrium (in  $\mu\text{mol}$ ).

$$dn_{ads}/dt = k_1(n_{eq} - n_{ads}) \quad (1)$$

The integration of Eq. (1) at the initial conditions ( $n_{ads} = 0$  at  $t = 0$ ) yields the Eq. (2):

$$\log(n_{eq} - n_{ads}) = \log(n_{eq}) - (k_1/2.303).t \quad (2)$$

In addition, a pseudo-second-order equation may be expressed by Eq. (3):

$$dn_{ads}/dt = k_2(n_{eq} - n_{ads})^2 \quad (3)$$

Where  $k_2$  is the pseudo-second-order rate constant ( $\mu\text{mol}^{-1}.\text{min}^{-1}$ ) for the adsorption. Applying the initial conditions, Eq. (3) can be integrated to obtain Eq. (4):

$$(1/n_{eq} - n_{ads}) = (1/n_{eq}) + k_2.t \quad (4)$$

The influence of the intraparticle diffusion phenomena upon the adsorption capacity of Y5 was verified keeping in mind that the fractional approach to equilibrium change is done according to a function of  $(D_t/r^2)^{1/2}$ , where  $r$  is the radius of adsorbent particle and  $D$  is the effective diffusivity of solute within the particle. The initial rate according to the intraparticle diffusion model (IPD) is obtained from the liner regression of the curve  $n_{ads-t} = f(t^{1/2})$ , expressed by the Eq. (5) where  $k_p$  is the IPD rate constant ( $\mu\text{mol min}^{-0.5}$ ), and  $C$  is a constant ( $\mu\text{mol}$ ) attributed to the extension of the boundary layer thickness.

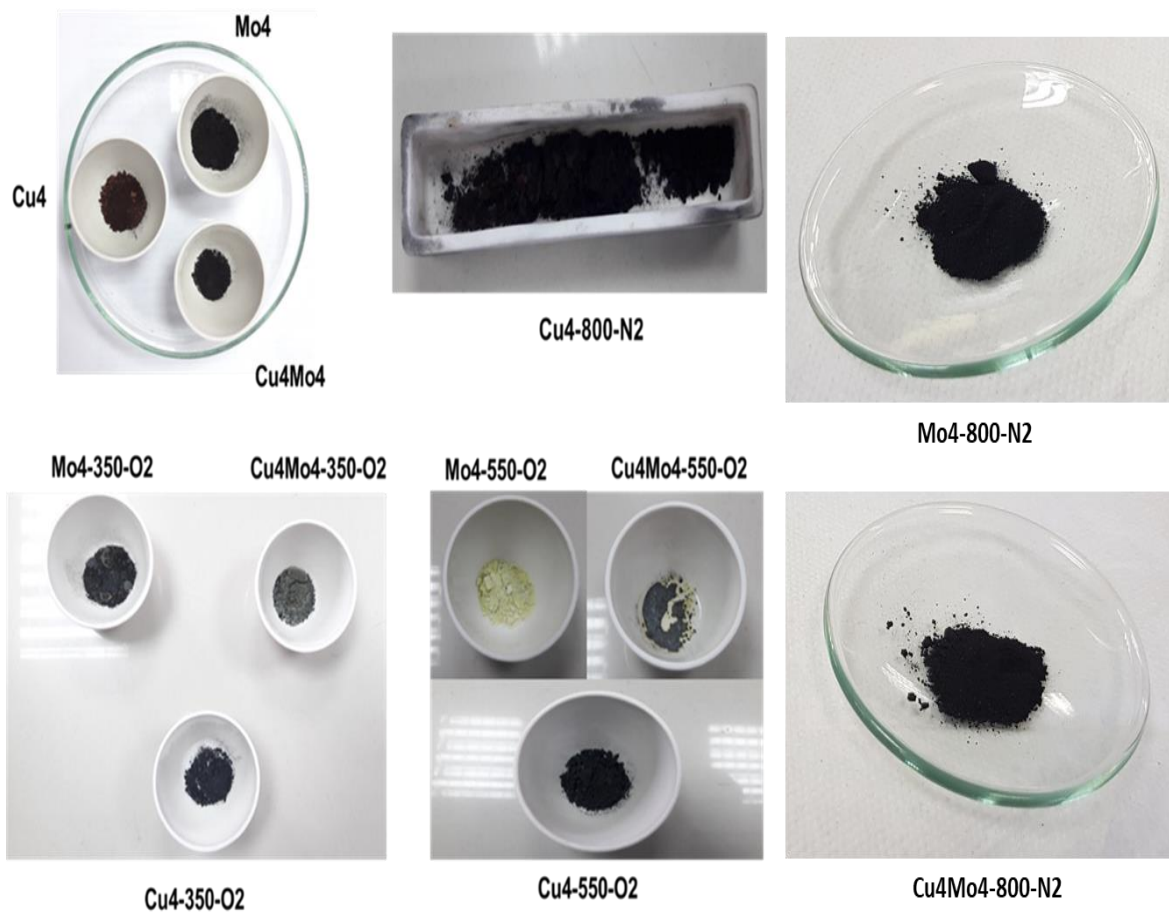

**Figure S1.** Images of the Cu-, Mo-, and CuMo-based photocatalysts prepared.

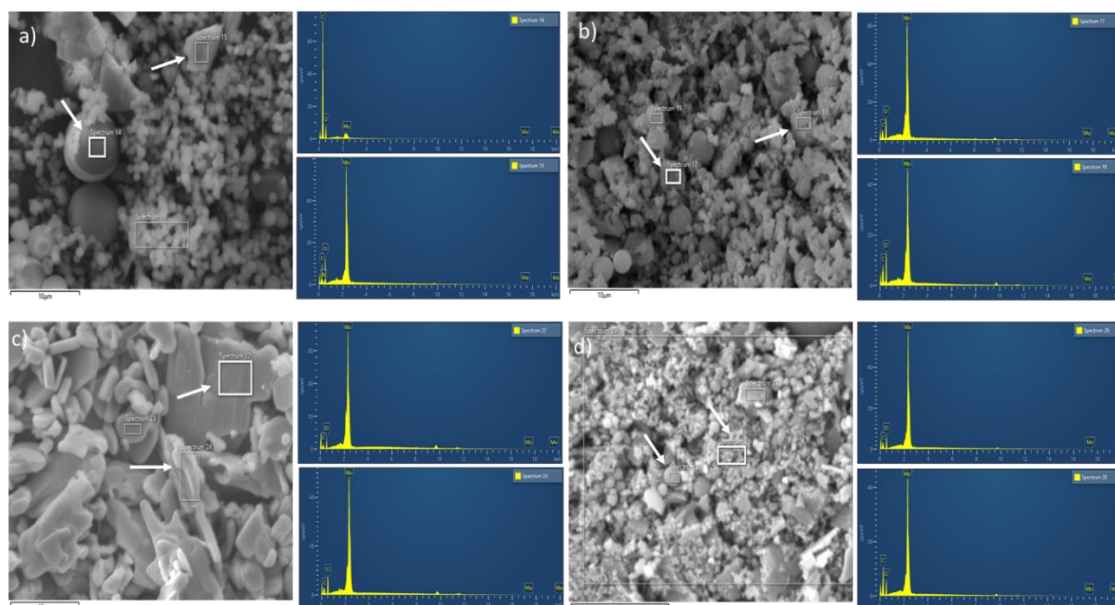

**Figure S2.** Composition of SEM-EDS analysis of Mo-based catalysts. a) Mo4; b) Mo4-350-O<sub>2</sub>; c) Mo4-550-O<sub>2</sub>; d) Mo4-800-N<sub>2</sub>.

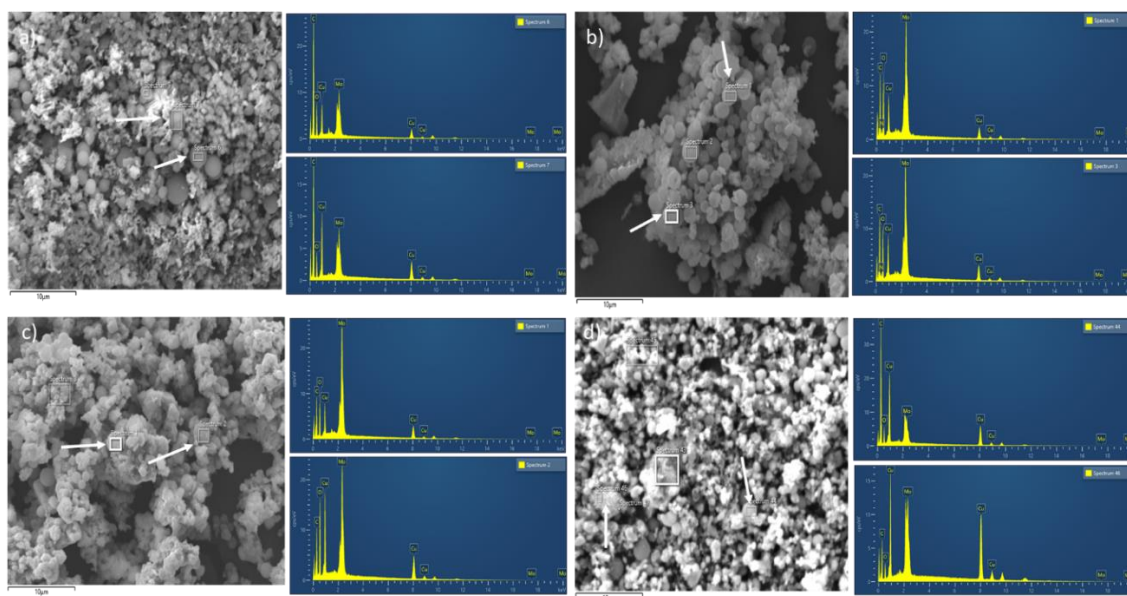

**Figure S3.** Composition of SEM-EDS analysis of CuMo-based catalysts. a) Cu4Mo4; b) Cu4Mo4-350-O<sub>2</sub>; c) Cu4Mo4-550-O<sub>2</sub>; d) Cu4Mo4-800-N<sub>2</sub>.

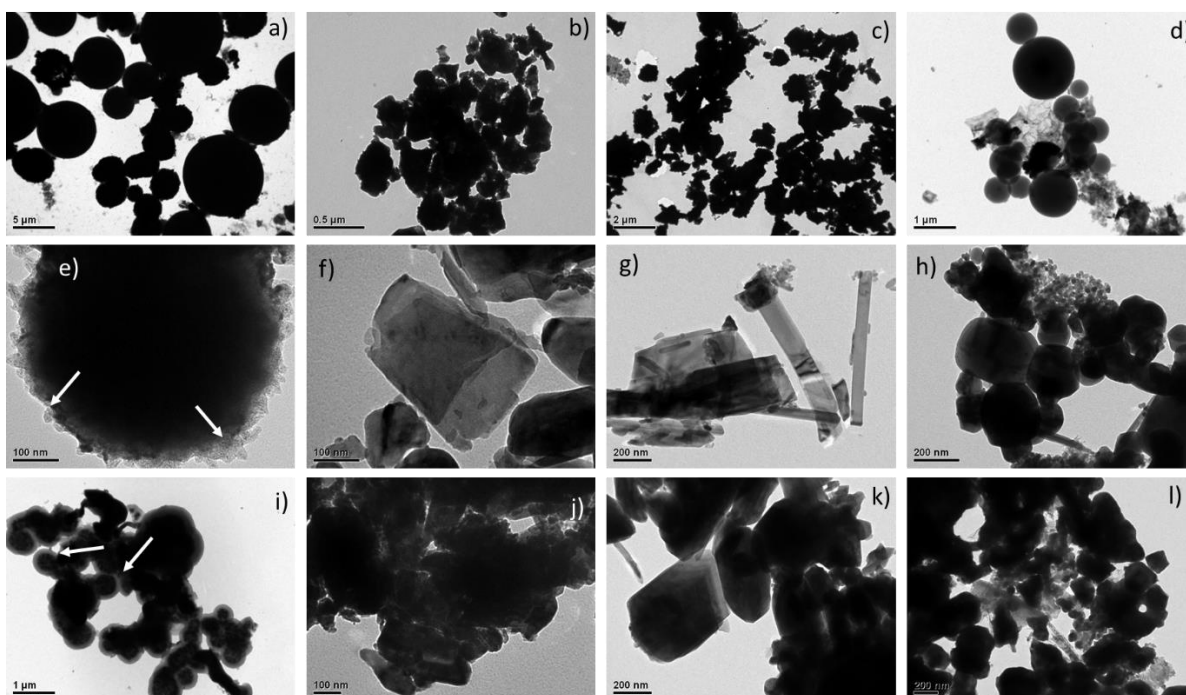

**Figure S4.** Transmission electron microscopy images. a) Cu<sub>4</sub>; b) Cu<sub>4</sub>-350-O<sub>2</sub>; c) Cu<sub>4</sub>-550-O<sub>2</sub>; d) Cu<sub>4</sub>-800-N<sub>2</sub>; e) Mo<sub>4</sub>; f) Mo<sub>4</sub>-350-O<sub>2</sub>; g) Mo<sub>4</sub>-550-O<sub>2</sub>; h) Mo<sub>4</sub>-800-N<sub>2</sub>; i) Cu<sub>4</sub>Mo<sub>4</sub>; j) Cu<sub>4</sub>Mo<sub>4</sub>-350-O<sub>2</sub>; k) Cu<sub>4</sub>Mo<sub>4</sub>-550-O<sub>2</sub>; l) Cu<sub>4</sub>Mo<sub>4</sub>-800-N<sub>2</sub>.

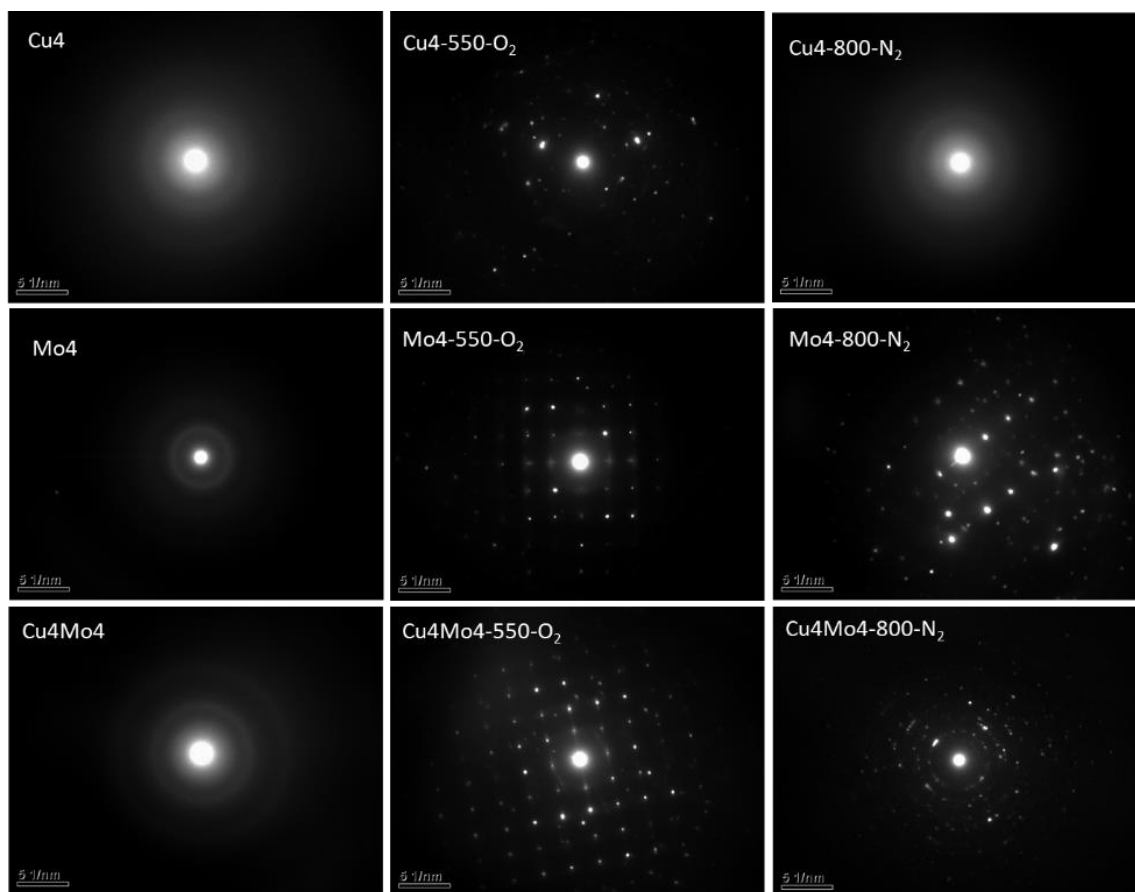

**Figure S5.** Selected ED patterns of catalysts.



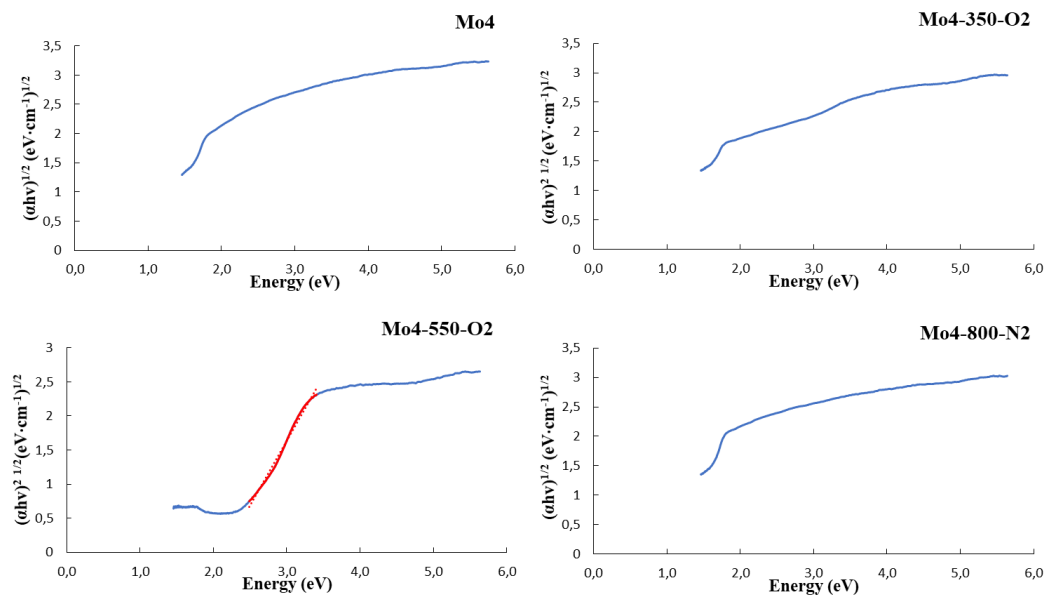

**Figure S6.** Tauc representation from the Kubelka–Munk function of Mo-based materials.

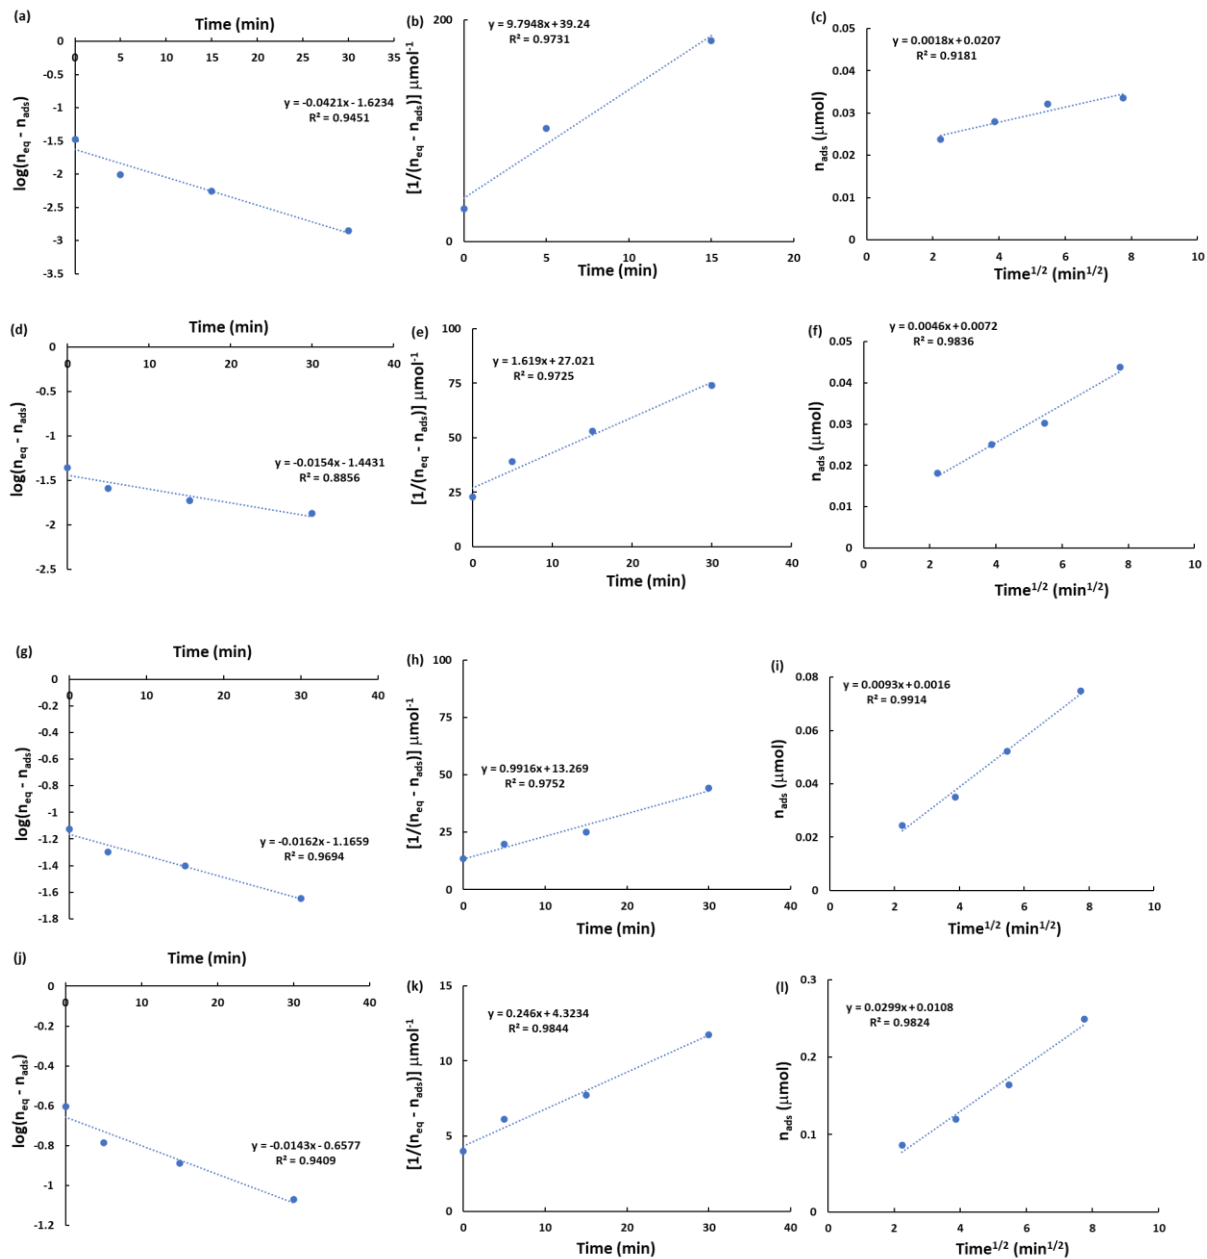

**Figure S7.** Fitting of the experimental kinetic data for Y5 adsorption on the Cu-based photocatalysts, using different models: Left: Pseudo first-order; Middle: Pseudo second-order; Right: Intraparticle diffusion model. (a,b,c): Cu4; (d,e,f): Cu4-350-O<sub>2</sub>; (g,h,i): Cu4-550-O<sub>2</sub>; (j,k,l): Cu4-800-N<sub>2</sub>.

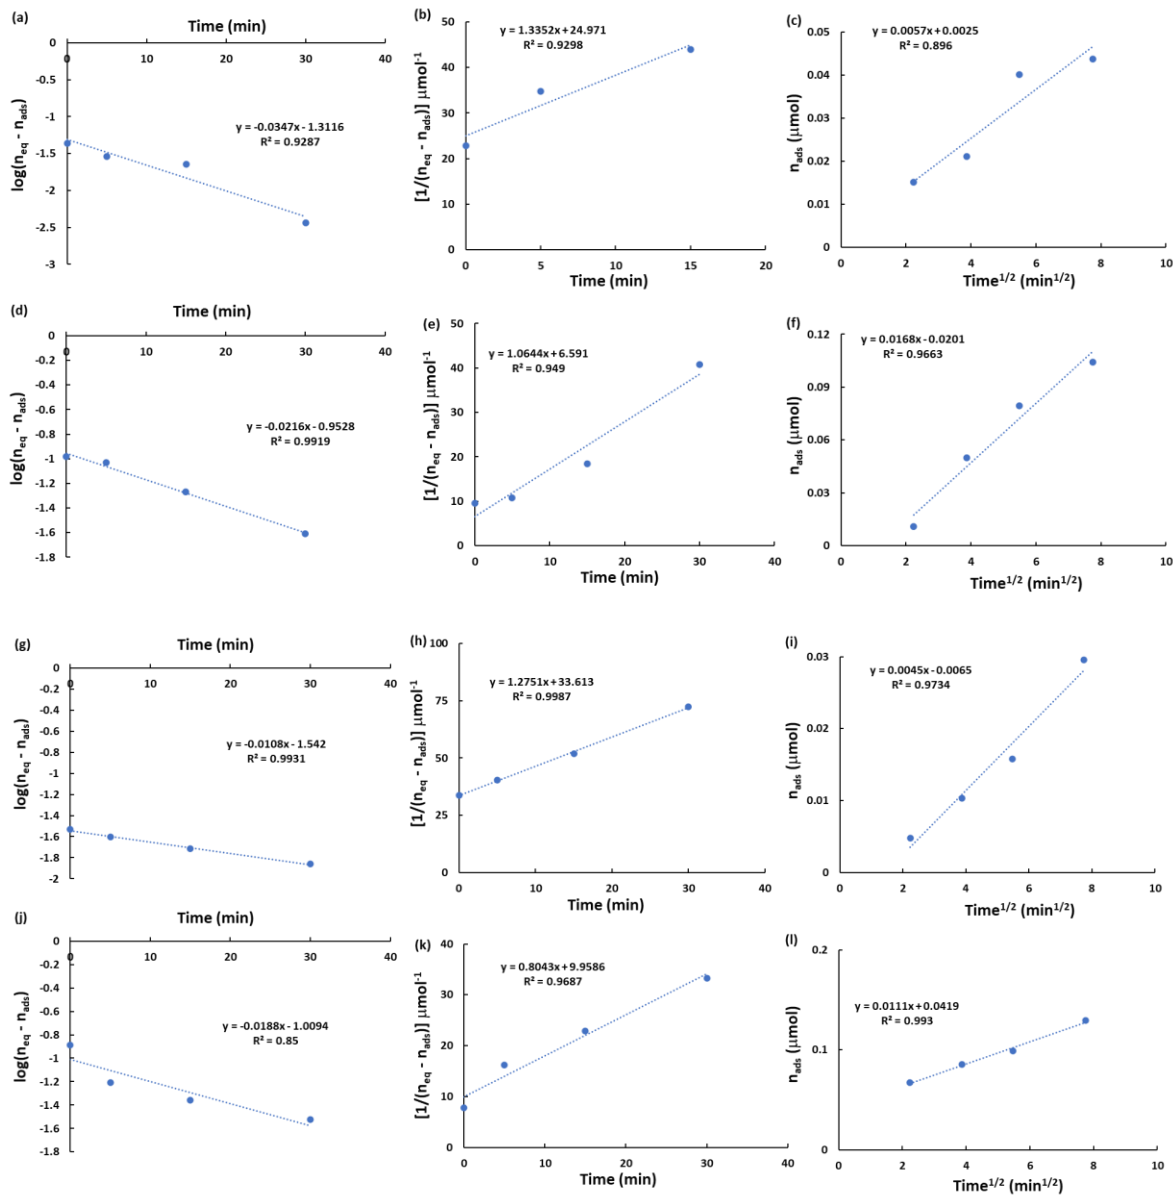

**Figure S8.** Fitting of the experimental kinetic data for Y5 adsorption on the Mo-based photocatalysts, using different models: Pseudo first-order; Middle: Pseudo second-order; Right: Intraparticle diffusion model. (a,b,c): Mo4; (d,e,f): Mo4-350-O<sub>2</sub>; (g,h,i): Mo4-550-O<sub>2</sub>; (j,k,l): Mo4-800-N<sub>2</sub>.

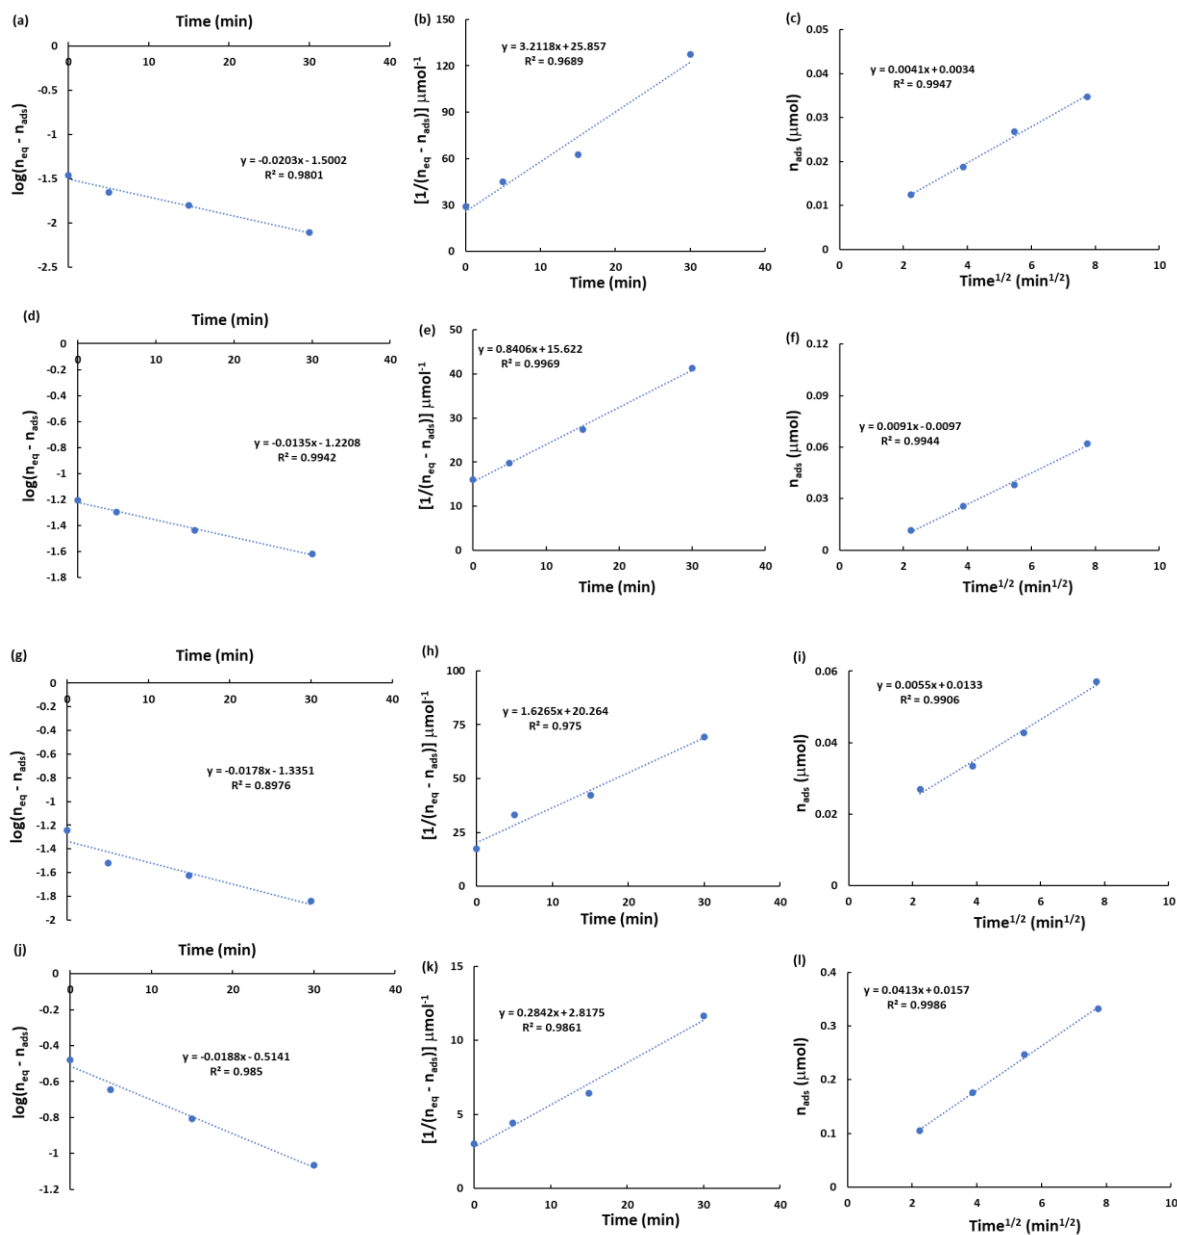

**Figure S9.** Fitting of the experimental kinetic data for Y5 adsorption on the CuMo-based photocatalysts, using different models: Left: Pseudo first-order; Middle: Pseudo second-order; Right: Intraparticle diffusion model. (a,b,c): Cu4Mo4; (d,e,f): Cu4Mo4-350-O<sub>2</sub>; (g,h,i): Cu4Mo4-550-O<sub>2</sub>; (j,k,l): Cu4Mo4-800-N<sub>2</sub>.

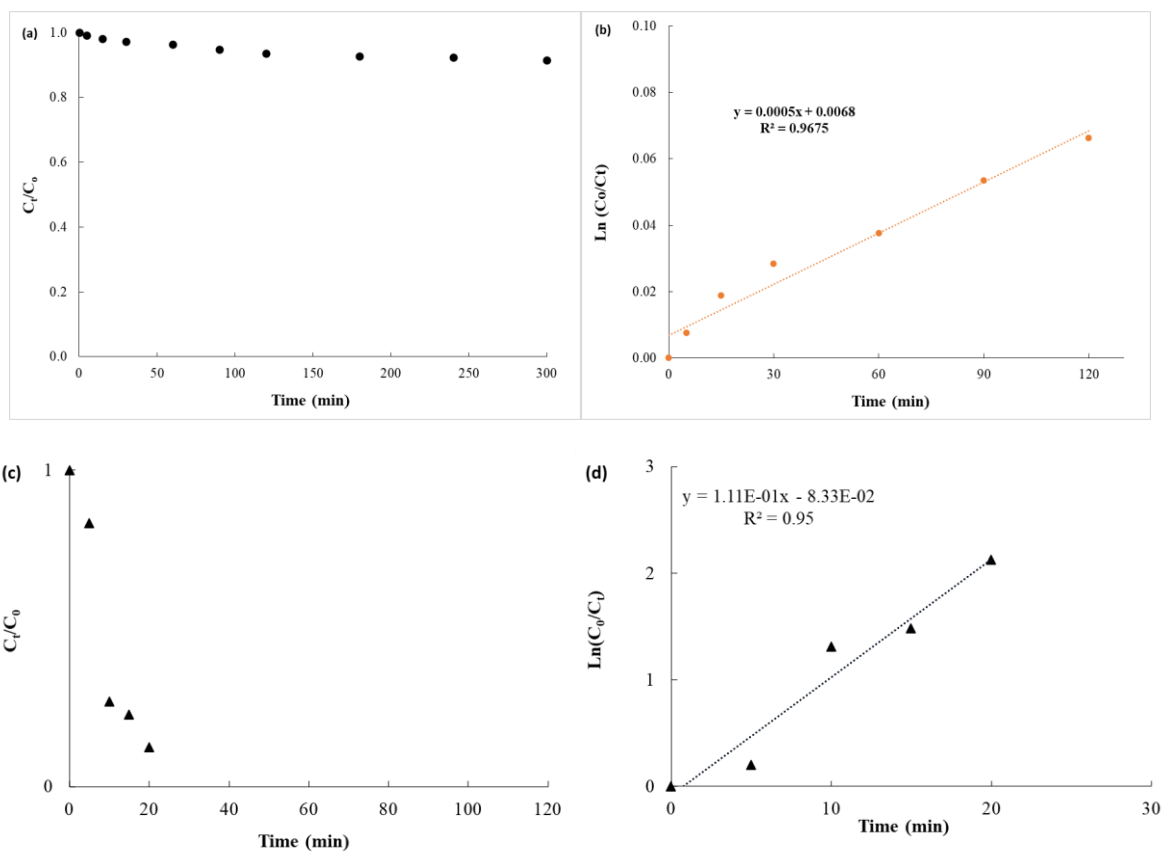

**Figure S10.** (a) Kinetics of Y5 disappearance upon direct photolysis. (b) Linear regression of the kinetics data from **Figure S10a**. (c) Kinetics of Y5 disappearance on irradiated  $\text{TiO}_2$ -P25. (d) Linear regression of the kinetics data from **Figure S10c**. Initial concentration: 5ppm.

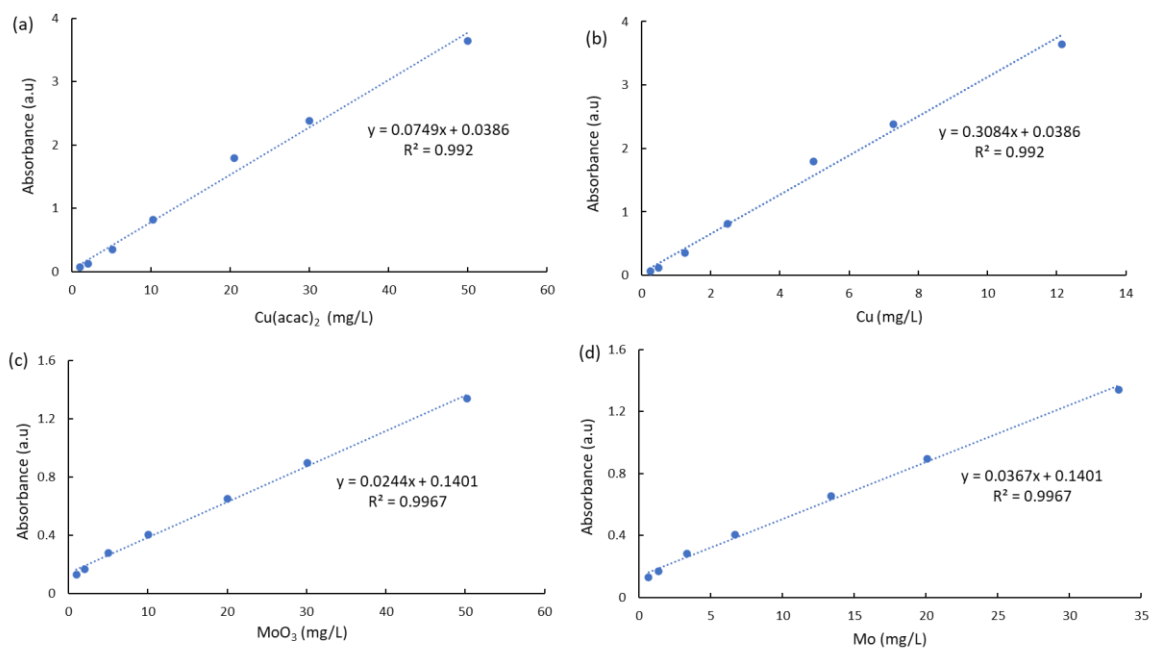

**Figure S11.** Calibration curves for the determination of copper (290 nm) and molybdenum (208 nm) ions in the leaching tests: (a)  $\text{Cu}(\text{acac})_2$ ; (b) expressed as equivalent Cu(II) in  $\text{Cu}(\text{acac})_2$ ; (c):  $\text{MoO}_3$ ; (d) expressed as equivalent Mo(III) in  $\text{MoO}_3$ .
